# Supplementary material for: Happy Cow or Thinking Pig? WUR Wolf—Facial Coding Platform for Measuring Emotions in Farm Animals
Source: MDPI journal article supplement (doi:10.3390/ai2030021), 2021-08-05
Supplement: s1 [file s1]

Archive with 2 entries (2 files):
- Supplementary File April 20 2021.pdf
- Video WUR Wolf Facial Coding Platform.mp4
