# Supplementary material for: Happy Cow or Thinking Pig? WUR Wolf—Facial Coding Platform for Measuring Emotions in Farm Animals
Source: MDPI journal article supplement (doi:10.3390/ai2030021), 2021-08-05
Supplement: s1 [file s1 › Supplementary File April 20 2021.pdf]

# Happy Cow or Thinking Pig? WUR Wolf – Facial Coding Platform for Measuring Emotions in Farm Animals

Suresh Neethirajan<sup>1\*</sup>

<sup>1</sup> Adaptation Physiology Group, Department of Animal Sciences, Wageningen University & Research, 6700 AH Wageningen, The Netherlands.

\* Correspondence: suresh.neethirajan@wur.nl

**Table S1.** The confusion matrix of DarkNet-53 trained and tested on the farm animals' images and videos dataset using YoloV3

|                   | Cow Excited Cow Frustrated Cow Relaxed Aversion Negative Negative Emotions Neutral State<br>Aggression Alert Neutral Positive Emotions |    |    |     |     |    |     |    |     |
|-------------------|----------------------------------------------------------------------------------------------------------------------------------------|----|----|-----|-----|----|-----|----|-----|
| Cow Excited       | 103                                                                                                                                    | 2  | 5  | 0   | 3   | 0  | 1   | 5  | 0   |
| Cow Frustrated    | 4                                                                                                                                      | 94 | 3  | 12  | 2   | 8  | 0   | 0  | 1   |
| Cow Relaxed       | 10                                                                                                                                     | 0  | 75 | 2   | 1   | 0  | 0   | 4  | 0   |
| Aversion Negative | 8                                                                                                                                      | 0  | 1  | 101 | 1   | 2  | 0   | 4  | 0   |
| Negative Emotions | 0                                                                                                                                      | 1  | 1  | 4   | 114 | 2  | 0   | 1  | 0   |
| Neutral State     | 1                                                                                                                                      | 1  | 0  | 1   | 4   | 85 | 2   | 1  | 0   |
| Aggression        | 3                                                                                                                                      | 0  | 0  | 1   | 1   | 1  | 120 | 0  | 1   |
| Alert Neutral     | 0                                                                                                                                      | 0  | 2  | 0   | 3   | 0  | 4   | 96 | 6   |
| Positive Emotions | 0                                                                                                                                      | 1  | 2  | 4   | 6   | 1  | 0   | 2  | 110 |

**Table S2.** The confusion matrix of CSPDarkNet-53 trained and tested on the farm animals' images and videos dataset using YoloV4

|                   | Cow Excited Cow Frustrated Cow Relaxed Aversion Negative Negative Emotions Neutral State<br>Aggression Alert Neutral Positive Emotions |    |    |     |     |     |    |    |     |
|-------------------|----------------------------------------------------------------------------------------------------------------------------------------|----|----|-----|-----|-----|----|----|-----|
| Cow Excited       | 100                                                                                                                                    | 1  | 0  | 0   | 4   | 3   | 0  | 0  | 0   |
| Cow Frustrated    | 1                                                                                                                                      | 99 | 0  | 2   | 5   | 4   | 3  | 4  | 1   |
| Cow Relaxed       | 2                                                                                                                                      | 1  | 83 | 0   | 1   | 0   | 0  | 1  | 1   |
| Aversion Negative | 2                                                                                                                                      | 0  | 1  | 108 | 1   | 2   | 5  | 2  | 3   |
| Negative Emotions | 0                                                                                                                                      | 0  | 0  | 1   | 131 | 2   | 0  | 0  | 0   |
| Neutral State     | 2                                                                                                                                      | 0  | 1  | 1   | 8   | 105 | 0  | 1  | 3   |
| Aggression        | 4                                                                                                                                      | 1  | 1  | 2   | 1   | 0   | 92 | 2  | 0   |
| Alert Neutral     | 2                                                                                                                                      | 0  | 0  | 1   | 2   | 0   | 1  | 97 | 12  |
| Positive Emotions | 5                                                                                                                                      | 4  | 0  | 1   | 0   | 0   | 0  | 2  | 106 |

**Table S3.** The confusion matrix of VGG-16 trained and tested on the farm animals' images and videos dataset using Faster RCNN

|                   | Cow Excited Cow Frustrated Cow Relaxed Aversion Negative Negative Emotions Neutral State<br>Aggression Alert Neutral Positive Emotions |    |    |     |     |    |     |    |     |
|-------------------|----------------------------------------------------------------------------------------------------------------------------------------|----|----|-----|-----|----|-----|----|-----|
| Cow Excited       | 114                                                                                                                                    | 1  | 6  | 0   | 14  | 0  | 0   | 3  | 1   |
| Cow Frustrated    | 0                                                                                                                                      | 86 | 3  | 14  | 0   | 4  | 1   | 0  | 0   |
| Cow Relaxed       | 1                                                                                                                                      | 0  | 96 | 2   | 3   | 0  | 4   | 1  | 0   |
| Aversion Negative | 8                                                                                                                                      | 0  | 1  | 101 | 0   | 0  | 0   | 2  | 1   |
| Negative Emotions | 0                                                                                                                                      | 1  | 1  | 4   | 112 | 2  | 0   | 1  | 0   |
| Neutral State     | 0                                                                                                                                      | 0  | 1  | 1   | 8   | 99 | 2   | 1  | 4   |
| Aggression        | 7                                                                                                                                      | 0  | 0  | 3   | 2   | 1  | 110 | 1  | 1   |
| Alert Neutral     | 2                                                                                                                                      | 1  | 0  | 0   | 1   | 0  | 1   | 66 | 1   |
| Positive Emotions | 4                                                                                                                                      | 1  | 1  | 0   | 3   | 1  | 0   | 2  | 108 |

**Table S4.** F1-Scores for emotion detection and recognition by Yolov3 from facial features of cows and pigs' images and videos data set

| Classes           | Precision | Recall | F1-Score |
|-------------------|-----------|--------|----------|
| Cow Excited       | 0.79      | 0.86   | 82%      |
| Cow Frustrated    | 0.94      | 0.75   | 83%      |
| Cow Relaxed       | 0.84      | 0.815  | 82%      |
| Aversion Negative | 0.808     | 0.86   | 83%      |
| Negative Emotions | 0.84      | 0.92   | 87%      |
| Neutral State     | 0.85      | 0.89   | 86%      |
| Aggression        | 0.94      | 0.94   | 94%      |
| Alert Neutral     | 0.84      | 0.86   | 84%      |
| Positive Emotions | 0.92      | 0.85   | 88%      |

**Table S5.** F1-Scores for emotion detection and recognition by Yolov4 from facial features of cows and pigs' images and videos data set

| Classes           | Precision | Recall | F1-Score |
|-------------------|-----------|--------|----------|
| Cow Excited       | 0.84      | 0.92   | 87%      |
| Cow Frustrated    | 0.93      | 0.83   | 87%      |
| Cow Relaxed       | 0.96      | 0.93   | 94%      |
| Aversion Negative | 0.93      | 0.87   | 89%      |
| Negative Emotions | 0.85      | 0.97   | 90%      |
| Neutral State     | 0.91      | 0.86   | 88%      |
| Aggression        | 0.91      | 0.89   | 89%      |
| Alert Neutral     | 0.88      | 0.84   | 85%      |
| Positive Emotions | 0.9       | 0.84   | 86%      |

**Table S6.** F1-Scores for emotion detection and recognition by Faster RCNN from facial features of cows and pigs' images and videos data set

| Classes           | Precision | Recall | F1-Score |
|-------------------|-----------|--------|----------|
| Cow Excited       | 0.83      | 0.82   | 82%      |
| Cow Frustrated    | 0.96      | 0.79   | 86%      |
| Cow Relaxed       | 0.88      | 0.89   | 88%      |
| Aversion Negative | 0.80      | 0.89   | 84%      |
| Negative Emotions | 0.92      | 0.92   | 84%      |
| Neutral State     | 0.85      | 0.78   | 88%      |
| Aggression        | 0.88      | 0.93   | 90%      |
| Alert Neutral     | 0.91      | 0.85   | 87%      |
| Positive Emotions | 0.90      | 0.93   | 91%      |
